# Supplementary material for: Systemic and Cardiac Depletion of M2 Macrophage through CSF-1R Signaling Inhibition Alters Cardiac Function Post Myocardial Infarction
Source: PubMed Central journal article supplement (PMC4583226; doi:10.1371/journal.pone.0137515), 2015-09-25
Supplement: pone.0137515.s001.pdf [file pone.0137515.s001.pdf]

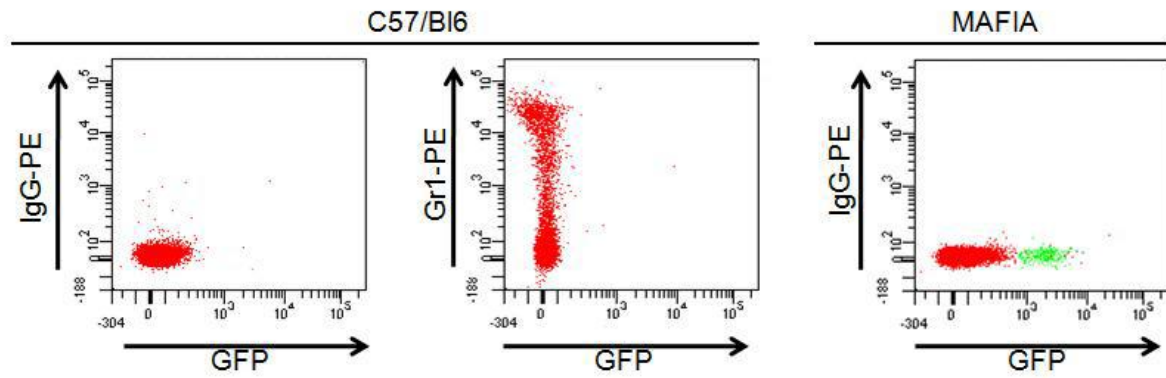

**Supplementary Figure 1 Staining controls for flow cytometry experiments**

Isotype controls and Gr1 staining alone done in C57/Bl6 mice in addition to IgG-PE staining in MAFIA mice showing application of correct spectral overlap and PMT voltage settings
