# Supplementary material for: Systemic and Cardiac Depletion of M2 Macrophage through CSF-1R Signaling Inhibition Alters Cardiac Function Post Myocardial Infarction
Source: PubMed Central journal article supplement (PMC4583226; doi:10.1371/journal.pone.0137515), 2015-09-25
Supplement: pone.0137515.s002.pdf [file pone.0137515.s002.pdf]

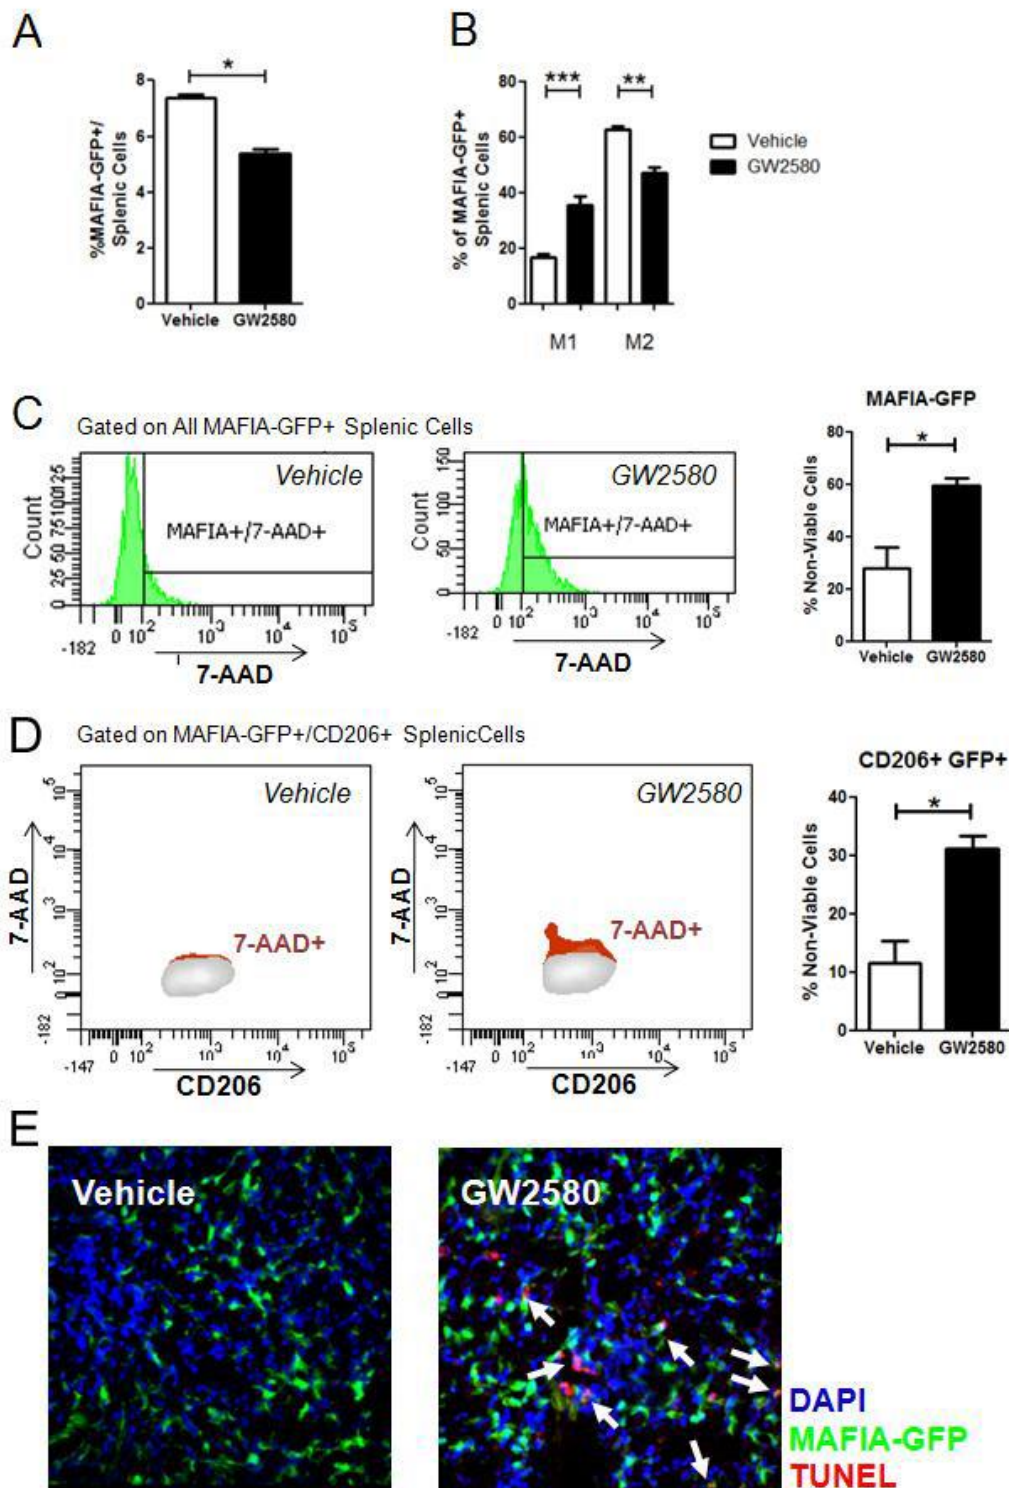

**Supplementary Figure 2 Depletion and increased apoptosis of splenic M2 macrophages following GW2580 treatment.** A Overall splenic macrophage population in the spleen detected by MAFIA-GFP was reduced by GW2580 treatment compared with Vehicle (\*: $p < 0.05$ ). B From the total MAFIA-GFP splenic macrophage population, GW2580 increased the proportion of M1 while decreasing the M2 macrophages in the spleen (\*\*\*: $p < 0.0001$ , \*\*: $p < 0.001$ ). C: GW2580 treatment increases cell death of overall splenic macrophages (\*: $p < 0.05$ ). D In the CD206+ M2 splenic macrophage subset, GW2580 treatment increases cell death as detected by 7-AAD (\*: $p < 0.05$ ). E: Apoptosis of *in situ* splenic macrophage verified by *in situ* TUNEL staining (red) of MAFIA-GFP (green) splenic cells. Nuclei were counterstained with DAPI.
