# Supplementary material for: Systemic and Cardiac Depletion of M2 Macrophage through CSF-1R Signaling Inhibition Alters Cardiac Function Post Myocardial Infarction
Source: PubMed Central journal article supplement (PMC4583226; doi:10.1371/journal.pone.0137515), 2015-09-25
Supplement: pone.0137515.s003.pdf [file pone.0137515.s003.pdf]

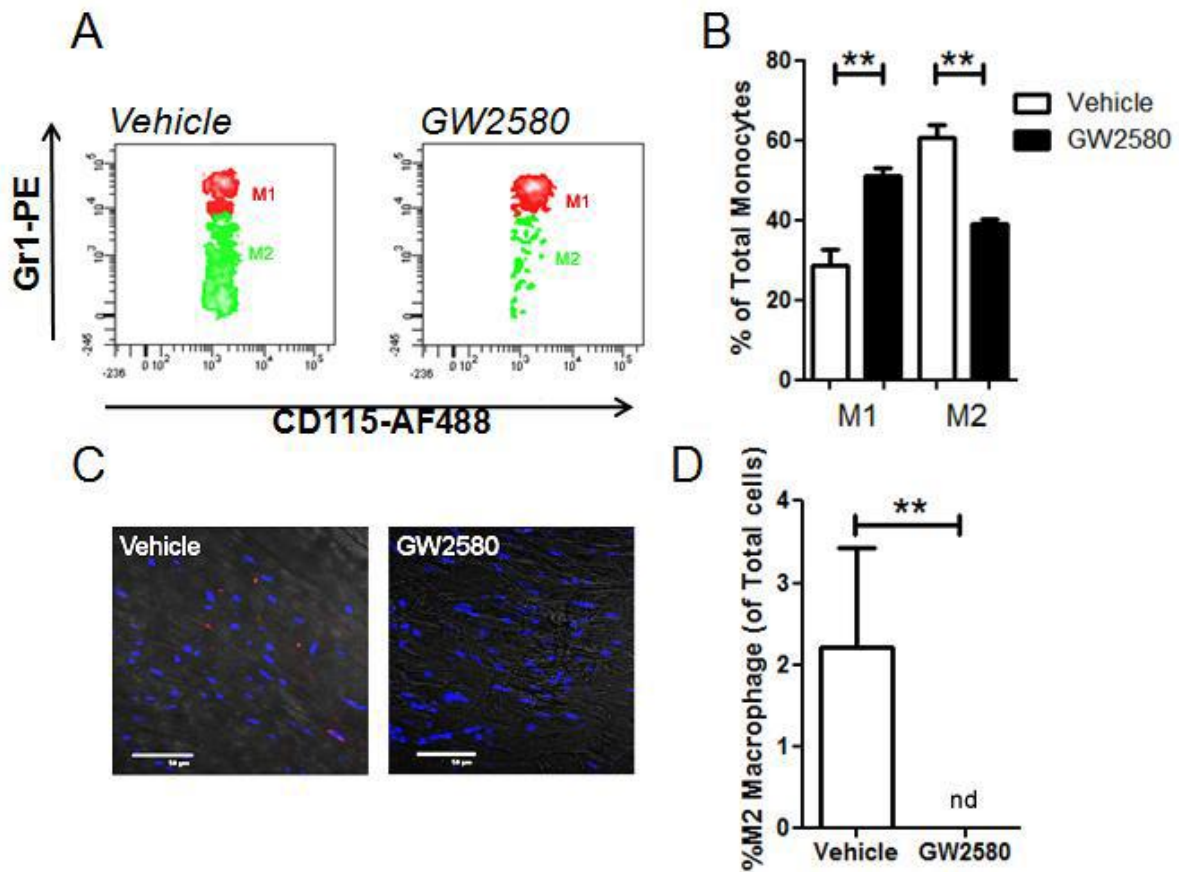

**Supplementary Figure 3 M2 macrophage depletion in C57/Bl/6 mice.**

A,B. FACS quantification of Gr1<sup>hi</sup> (M1) and Gr1<sup>lo</sup> (M2) in total monocytes from wild type C57/Bl/6 mice following 1 week GW2580 treatment (n = 5 animals per group, respectively). C,D Immunofluorescence analysis of CD206+ cells (red) in heart tissue following 1 week vehicle or GW2580 treatment (Scale bar: 10  $\mu$ m, \*\*:p>0.001, nd: not detected).
