# Supplementary material for: Systemic and Cardiac Depletion of M2 Macrophage through CSF-1R Signaling Inhibition Alters Cardiac Function Post Myocardial Infarction
Source: PubMed Central journal article supplement (PMC4583226; doi:10.1371/journal.pone.0137515), 2015-09-25
Supplement: pone.0137515.s005.pdf [file pone.0137515.s005.pdf]

**Supplementary Table 1** Primers used for qRT-PCR

| <b>Gene</b> | <b>Forward</b>       | <b>Reverse</b>         |
|-------------|----------------------|------------------------|
| IL6         | ccagttgccttcttgggact | ggtctgttgggagtggatcc   |
| IL1beta     | Ctgggtgtgacgttccatta | ccgacagcacgaccgttt     |
| ARG1        | aggaactggctgaagtggta | gatgagaaaggaaagtggctgt |
| CD206       | caggtgtgggctcaggtagt | tgtggtgagctgaaaggtga   |
